# Supplementary material for: Global Rsh-dependent transcription profile of Brucella suis during stringent response unravels adaptation to nutrient starvation and cross-talk with other stress responses
Source: PubMed Central journal article supplement (PMC3710219; doi:10.1186/1471-2164-14-459), 2013-07-08
Supplement: 1471-2164-14-459-S1.pdf [file 1471-2164-14-459-S1.pdf]

**Table S1. Up-regulation (grey) and down-regulation (white) of Rsh-dependent genes in the *B. suis* wild-type, as determined by transcriptome analysis of the stringent response.**

| Functional group      | Gene ID | Relative Fold WT/ $\Delta$ <i>rsh</i> (log2)             | Annotated Function <sup>a</sup>                                                             |
|-----------------------|---------|----------------------------------------------------------|---------------------------------------------------------------------------------------------|
| Amino acid metabolism |         |                                                          |                                                                                             |
|                       | BRA0338 | 1.58                                                     | glutamate decarboxylase GadA, authentic point mutation                                      |
|                       | BRA0340 | 1.33                                                     | glutaminase                                                                                 |
|                       | BR0793  | 0.88                                                     | O-acetylhomoserine aminocarboxypropyltransferase                                            |
|                       | BR0679  | -0.82                                                    | 2-isopropylmalate synthase                                                                  |
|                       | BR0232  | -0.83                                                    | <i>soxG</i> : sarcosine oxidase, gamma subunit                                              |
|                       | BR0646  | -0.84                                                    | <i>dapA</i> : dihydrodipicolinate synthase                                                  |
|                       | BR1293  | -0.89                                                    | branched-chain amino acid ABC transporter, periplasmic amino acid-binding protein, putative |
|                       | BR1932  | -0.91                                                    | <i>dapF</i> : diaminopimelate epimerase                                                     |
|                       | BR1983  | -0.93                                                    | <i>lysA</i> : diaminopimelate decarboxylase                                                 |
|                       | BRA0890 | -0.93                                                    | <i>leuB</i> : 3-isopropylmalate dehydrogenase                                               |
|                       | BR1988  | -0.99                                                    | <i>tyrC</i> : prephenate dehydrogenase                                                      |
|                       | BR0020  | -0.99                                                    | <i>ivd</i> : isovaleryl-CoA dehydrogenase                                                   |
|                       | BRA0932 | -1.20                                                    | <i>hutU</i> : urocanate hydratase                                                           |
|                       | BR1140  | -1.30                                                    | <i>trpD</i> : anthranilate phosphoribosyltransferase                                        |
| BR0614                | -1.32   | <i>glnE</i> : glutamate-ammonia-ligase adenyltransferase |                                                                                             |
| BRA0486               | -1.39   | <i>metA</i> : homoserine O-succinyltransferase           |                                                                                             |
| Cell division         |         |                                                          |                                                                                             |
|                       | BRA0530 | 1.26                                                     | cell division protein FtsK, putative                                                        |
|                       | BR1895  | 1.04                                                     | cell division protein FtsK, putative                                                        |
|                       | BR0881  | -1.06                                                    | <i>scpB</i> : segregation and condensation protein B                                        |
| Cell envelope         |         |                                                          |                                                                                             |
|                       | BR0119  | 1.86                                                     | outer membrane protein, putative                                                            |
|                       | BR0783  | 1.75                                                     | capsule polysaccharide export protein, putative                                             |
|                       | BR1930  | 1.62                                                     | <i>omp19</i> : lipoprotein Omp19                                                            |
|                       | BR0982  | 1.55                                                     | <i>wbdA</i> : glycosyl transferase, group 1 family protein                                  |
|                       | BR0971  | 1.52                                                     | outer membrane protein, putative                                                            |
|                       | BRA0137 | 1.38                                                     | dolichyl-phosphate-mannose-protein mannosyltransferase family protein                       |
|                       | BR0433  | 1.34                                                     | transglycosylase-associated protein, putative                                               |
|                       | BRA0423 | 1.25                                                     | <i>omp31-2</i> : outer membrane protein, 31 kDa                                             |
|                       | BRA0542 | 1.24                                                     | NAD-dependent epimerase/dehydratase family protein                                          |
|                       | BR1622  | 1.16                                                     | <i>omp31-1</i> : outer membrane protein Omp31                                               |
|                       | BR0615  | 1.15                                                     | <i>lpsA</i> : hypothetical protein                                                          |
|                       | BR0915  | 1.03                                                     | <i>amiC</i> : N-acetylmuramoyl-L-alanine amidase, family 3                                  |
|                       | BR0578  | 0.98                                                     | peptidoglycan-binding protein, putative                                                     |

|                                            |         |       |                                                                                                  |
|--------------------------------------------|---------|-------|--------------------------------------------------------------------------------------------------|
|                                            | BR0118  | 0.98  | outer membrane protein, putative                                                                 |
|                                            | BR0511  | 0.92  | <i>wbpL</i> : glycosyl transferase, group 4 family protein                                       |
|                                            | BR1205  | 0.90  | lipoprotein, putative                                                                            |
|                                            | BR1133  | -0.89 | <i>kdsA</i> : 2-dehydro-3-deoxyphosphooctonate aldolase                                          |
|                                            | BRA0381 | -0.90 | membrane antigen, putative                                                                       |
|                                            | BR0909  | -0.90 | <i>dsbA</i> : outer membrane protein, putative                                                   |
|                                            | BR0501  | -1.01 | lipoprotein, putative, authentic point mutation                                                  |
|                                            | BR2135  | -1.07 | rare lipoprotein A family protein                                                                |
|                                            | BRA0487 | -1.13 | glycosyl hydrolase family 25                                                                     |
|                                            | BR1435  | -1.31 | <i>murF</i> : UDP-N-acetylmuramoylalanyl-D-glutamyl-2,6-diaminopimelate-D-alanyl-D-alanyl ligase |
|                                            | BR1204  | -1.70 | OmpA family protein                                                                              |
| <b>Central intermediate metabolism</b>     |         |       |                                                                                                  |
|                                            | BR1468  | 1.34  | choloylglycine hydrolase family protein                                                          |
|                                            | BR1993  | -1.90 | <i>ppa</i> : inorganic pyrophosphatase                                                           |
| <b>Chemotaxis &amp; motility</b>           |         |       |                                                                                                  |
|                                            | BRA1136 | -0.96 | <i>flaF</i> : flagellar protein FlaF, putative                                                   |
|                                            | BRA0122 | -0.86 | <i>fliG</i> : flagellar motor switch protein FliG, authentic point mutation                      |
| <b>Cofactor &amp; carrier biosynthesis</b> |         |       |                                                                                                  |
|                                            | BR1365  | 1.25  | <i>cbiM</i> : cobalamin biosynthesis protein CbiM                                                |
|                                            | BRA0489 | 1.12  | <i>bioA</i> : adenosylmethionine-8-amino-7-oxononanoate transaminase                             |
|                                            | BR2066  | 1.10  | <i>hemE</i> : uroporphyrinogen decarboxylase                                                     |
|                                            | BR0330  | 1.08  | <i>panB</i> : 3-methyl-2-oxobutanoate hydroxymethyltransferase                                   |
|                                            | BR1464  | 0.99  | <i>pncA</i> : pyrazinamidase/nicotinamidase                                                      |
|                                            | BR0683  | -0.82 | <i>pdxA</i> : 4-hydroxythreonine-4-phosphate dehydrogenase                                       |
|                                            | BR0866  | -0.83 | <i>cobS</i> : cobalamin synthase                                                                 |
|                                            | BR1142  | -0.86 | <i>moaC</i> : molybdenum cofactor biosynthesis protein C                                         |
|                                            | BR2131  | -0.88 | <i>gshB</i> : glutathione synthetase                                                             |
|                                            | BR1299  | -0.92 | <i>cobK</i> : precorrin-6x reductase                                                             |
|                                            | BR1289  | -0.93 | <i>cbiG</i> : protein/precorrin-3B C17-methyltransferase                                         |
|                                            | BR1124  | -0.99 | <i>lipA</i> : lipoyl synthase                                                                    |
|                                            | BRA0013 | -1.19 | <i>entA</i> : 2,3-dihydroxybenzoate-2,3-dehydrogenase                                            |
|                                            | BRA0015 | -1.22 | <i>entE</i> : 2,3-dihydroxybenzoate-AMP ligase                                                   |
| <b>Detoxification</b>                      |         |       |                                                                                                  |
|                                            | BRA0703 | 2.40  | <i>sodC</i> : superoxide dismutase, Cu-Zn                                                        |
| <b>DNA/RNA metabolism</b>                  |         |       |                                                                                                  |
|                                            | BR1105  | 1.26  | DNA-binding protein HU                                                                           |
|                                            | BRA0317 | 1.07  | <i>nrdF</i> : ribonucleotide-diphosphate reductase beta subunit                                  |
|                                            | BRA0751 | 1.04  | endoribonuclease L-PSP, putative                                                                 |
|                                            | BRA0599 | 0.96  | <i>pyrB</i> : aspartate carbamoyltransferase catalytic subunit                                   |
|                                            | BR2183  | 0.96  | <i>mutM</i> : formamidopyrimidine-DNA glycosylase                                                |
|                                            | BR1399  | 0.93  | <i>thyA</i> : thymidylate synthase                                                               |
|                                            | BR1804  | 0.90  | <i>priA</i> : primosome assembly protein PriA                                                    |

|                              |         |                                                                                 |                                                                           |
|------------------------------|---------|---------------------------------------------------------------------------------|---------------------------------------------------------------------------|
|                              | BR0778  | 0.88                                                                            | <i>himA</i> : integration host factor alpha subunit                       |
|                              | BRA0604 | 0.87                                                                            | <i>topA</i> : DNA topoisomerase I                                         |
|                              | BR0032  | 0.86                                                                            | <i>recR</i> : recombination protein RecR                                  |
|                              | BRA0841 | -0.89                                                                           | <i>hsdS</i> : type I restriction-modification system, S subunit           |
|                              | BR0873  | -0.97                                                                           | <i>xth-I</i> : exodeoxyribonuclease III                                   |
|                              | BR1283  | -0.99                                                                           | <i>radC</i> : DNA repair protein RadC                                     |
|                              | BRA0840 | -1.16                                                                           | <i>hsdM</i> : type I restriction-modification system, M subunit           |
|                              | BR0842  | -1.20                                                                           | <i>purC</i> : phosphoribosylaminoimidazole-succinocarboxamide synthase    |
|                              | BR1249  | -1.21                                                                           | <i>nusG</i> : transcription antitermination protein NusG                  |
| <b>Energy metabolism</b>     |         |                                                                                 |                                                                           |
|                              | BRA0297 | 1.38                                                                            | <i>narJ</i> : respiratory nitrate reductase, delta subunit                |
|                              | BRA0571 | 1.13                                                                            | <i>qor</i> : quinone oxidoreductase                                       |
|                              | BRA1014 | 1.08                                                                            | aldehyde dehydrogenase family protein                                     |
|                              | BR1061  | 1.05                                                                            | alcohol dehydrogenase, zinc-containing                                    |
|                              | BR0202  | 1.05                                                                            | aldehyde dehydrogenase family protein                                     |
|                              | BRA0168 | 1.04                                                                            | citrate lyase, beta subunit, putative                                     |
|                              | BRA1171 | 0.99                                                                            | aldehyde dehydrogenase family protein                                     |
|                              | BR0363  | 0.94                                                                            | <i>ccoN</i> : cytochrome <i>c</i> oxidase, <i>cbb3</i> -type, subunit I   |
|                              | BR0360  | 0.90                                                                            | <i>ccoP</i> : cytochrome <i>c</i> oxidase, <i>cbb3</i> -type, subunit III |
|                              | BR0203  | 0.87                                                                            | alcohol dehydrogenase, zinc-containing                                    |
|                              | BRA0299 | 0.86                                                                            | <i>narG</i> : respiratory nitrate reductase, alpha subunit                |
|                              | BR1801  | -0.82                                                                           | <i>atpA</i> : ATP synthase subunit A                                      |
|                              | BR1970  | -0.82                                                                           | <i>etfA</i> : electron transfer flavoprotein, alpha subunit               |
|                              | BR1901  | -0.84                                                                           | <i>sdhB</i> : succinate dehydrogenase catalytic subunit                   |
|                              | BRA0893 | -1.05                                                                           | <i>trx-2</i> : thioredoxin                                                |
|                              | BR0381  | -0.89                                                                           | ATP synthase protein I, putative                                          |
|                              | BRA1058 | -0.89                                                                           | aldehyde dehydrogenase family protein                                     |
|                              | BRA0386 | -0.91                                                                           | acetate kinase                                                            |
|                              | BR0384  | -0.93                                                                           | ATP synthase subunit B                                                    |
| BR1903                       | -0.93   | succinate dehydrogenase, hydrophobic membrane anchor protein, putative          |                                                                           |
| BR0382                       | -1.30   | <i>atpB</i> : ATP synthase subunit A                                            |                                                                           |
| BR0852                       | -1.48   | alcohol dehydrogenase, zinc-containing                                          |                                                                           |
| <b>Fatty acid metabolism</b> |         |                                                                                 |                                                                           |
|                              | BR1510  | 0.99                                                                            | long-chain acyl-CoA thioester hydrolase, putative                         |
|                              | BR0289  | 0.86                                                                            | <i>fadD</i> : acyl-CoA synthase                                           |
|                              | BR1994  | -0.84                                                                           | 1-acyl-sn-glycerol-3-phosphate acyltransferase, putative                  |
|                              | BR0907  | -0.86                                                                           | <i>accB</i> : acetyl-CoA carboxylase                                      |
|                              | BR2107  | -1.07                                                                           | <i>accD</i> : acetyl-CoA carboxylase beta subunit                         |
| BR0698                       | -1.31   | <i>pgsA</i> : CDP-diacylglycerol-glycerol-3-phosphate 3-phosphatidyltransferase |                                                                           |
| <b>Nitrogen metabolism</b>   |         |                                                                                 |                                                                           |
|                              | BR1358  | 1.86                                                                            | <i>ureC-2</i> : urease, alpha subunit                                     |
|                              | BR1360  | 1.70                                                                            | <i>ureF</i> : urease accessory protein UreF, putative                     |
|                              | BR1357  | 1.61                                                                            | <i>ureB-2</i> : urease, beta subunit                                      |

|                           |         |                                        |                                                       |
|---------------------------|---------|----------------------------------------|-------------------------------------------------------|
|                           | BR1361  | 1.46                                   | <i>ureG-2</i> : urease accessory protein UreG         |
|                           | BR1356  | 1.22                                   | <i>ureA-2</i> : urease, gamma subunit                 |
|                           | BR1359  | 1.11                                   | <i>ureE</i> : urease accessory protein UreE, putative |
|                           | BR0270  | -0.96                                  | <i>ureC-1</i> : urease, alpha subunit                 |
|                           | BR0271  | -1.21                                  | <i>ureE</i> : urease accessory protein UreE, putative |
|                           | BR0273  | -1.90                                  | <i>ureG-1</i> : urease accessory protein UreG         |
|                           | BR0267  | -2.33                                  | <i>ureD-1</i> : urease accessory protein UreD         |
|                           | BR0269  | -3.06                                  | <i>ureB-1</i> : urease, beta subunit                  |
| <b>Protein metabolism</b> |         |                                        |                                                       |
|                           | BR1197  | 2.35                                   | ThiJ/PfpI family protein                              |
|                           | BR1861  | 1.38                                   | peptidase, M23/M37 family                             |
|                           | BRA0289 | 1.30                                   | protease, putative                                    |
|                           | BR1915  | 0.87                                   | <i>rimM</i> : 16S rRNA-processing protein             |
|                           | BR1222  | -0.83                                  | <i>rplX</i> : 50S ribosomal protein L24               |
|                           | BR0755  | -0.83                                  | arginyl-tRNA-protein transferase                      |
|                           | BR0455  | -0.87                                  | <i>rpsF</i> : 30S ribosomal protein S6                |
|                           | BR1223  | -0.87                                  | <i>rplN</i> : 50S ribosomal protein L14               |
|                           | BR2015  | -0.87                                  | <i>rpmB</i> : 50S ribosomal protein L28               |
|                           | BR2117  | -0.88                                  | <i>infC</i> : translation initiation factor IF-3      |
|                           | BR0677  | -0.88                                  | <i>cysS</i> : cysteinyl-tRNA synthetase               |
|                           | BR1227  | -0.89                                  | <i>rpsC</i> : 30S ribosomal protein S3                |
|                           | BR0404  | -0.89                                  | <i>glyS</i> : glycyl-tRNA synthetase beta subunit     |
|                           | BR1251  | -0.90                                  | <i>tuf</i> : elongation factor Tu                     |
|                           | BR1535  | -0.91                                  | 50S ribosomal protein L25                             |
|                           | BR1219  | -0.95                                  | <i>rpsH</i> : 30S ribosomal protein S8                |
|                           | BR1228  | -0.95                                  | <i>rplV</i> : 50S ribosomal protein L22               |
|                           | BR1215  | -0.95                                  | <i>rpmD</i> : 50S ribosomal protein L30               |
|                           | BR1907  | -0.96                                  | <i>rplS</i> : 50S ribosomal protein L19               |
|                           | BR1231  | -0.96                                  | <i>rplW</i> : 50S ribosomal protein L23               |
|                           | BR0454  | -0.99                                  | <i>rpsR</i> : 30S ribosomal protein S18               |
|                           | BR1245  | -0.99                                  | <i>rplL</i> : 50S ribosomal protein L7/L12            |
|                           | BR0822  | -0.99                                  | <i>proS</i> : prolyl-tRNA synthetase                  |
|                           | BR1232  | -1.07                                  | <i>rplD</i> : 50S ribosomal protein L4                |
|                           | BR1162  | -1.10                                  | <i>rpsB</i> : 30S ribosomal protein S2                |
|                           | BR1161  | -1.10                                  | <i>tsf</i> : elongation factor Ts                     |
|                           | BR0314  | -1.08                                  | <i>pip</i> : proline iminopeptidase                   |
|                           | BR1233  | -1.15                                  | <i>rplC</i> : 50S ribosomal protein L3                |
|                           | BR1216  | -1.17                                  | <i>rpsE</i> : 30S ribosomal protein S5                |
|                           | BR1214  | -1.19                                  | <i>rplO</i> : ribosomal protein L15                   |
|                           | BR0027  | -1.20                                  | <i>rpsA</i> : 30S ribosomal protein S1                |
|                           | BR1230  | -1.22                                  | <i>rplB</i> : 50S ribosomal protein L2                |
|                           | BR1220  | -1.25                                  | <i>rpsN</i> : 30S ribosomal protein S14               |
| BR1218                    | -1.27   | <i>rplF</i> : 50S ribosomal protein L6 |                                                       |

|                                          |         |       |                                                                       |
|------------------------------------------|---------|-------|-----------------------------------------------------------------------|
|                                          | BR1229  | -1.28 | <i>rpsS</i> : 30S ribosomal protein S19                               |
|                                          | BR1196  | -1.29 | RNA methyltransferase, TrmH family, group 1                           |
|                                          | BR1849  | -1.31 | <i>rpmA</i> : 50S ribosomal protein L27                               |
|                                          | BR1236  | -1.38 | <i>fusA</i> : elongation factor EF-2                                  |
|                                          | BR1234  | -1.39 | <i>rpsJ</i> : 30S ribosomal protein S10                               |
|                                          | BR1237  | -1.57 | <i>rpsG</i> : 30S ribosomal protein S7                                |
|                                          | BR0830  | -1.58 | <i>rpsD</i> : 30S ribosomal protein S4                                |
|                                          | BR1238  | -1.63 | <i>rpsL</i> : 30S ribosomal protein S12                               |
| <b>Protein modification &amp; repair</b> |         |       |                                                                       |
|                                          | BR0905  | -0.82 | <i>aar</i> : leucyl/phenylalanyl-tRNA-protein transferase             |
| <b>Regulation</b>                        |         |       |                                                                       |
|                                          | BR1100  | 1.92  | transcriptional regulator, GntR family                                |
|                                          | BRA0744 | 1.56  | transcriptional regulator, RpiR family                                |
|                                          | BR1613  | 1.54  | transcriptional regulator, Cro/CI family                              |
|                                          | BR0201  | 1.21  | transcriptional regulator, Fis family, authentic frameshift           |
|                                          | BR0569  | 1.20  | transcriptional regulator, MucR                                       |
|                                          | BR2017  | 1.17  | transcriptional regulator, MerR family                                |
|                                          | BRA1074 | 1.06  | transcriptional regulator, GntR family                                |
|                                          | BR1086  | 1.03  | transcriptional regulator, LysR family                                |
|                                          | BRA0927 | 1.00  | <i>hutC</i> : histidine utilization repressor                         |
|                                          | BR0556  | 0.96  | transcription elongation factor GreA domain protein                   |
|                                          | BR0102  | 0.90  | response regulator, putative                                          |
|                                          | BRA0820 | 0.89  | transcriptional regulator, MerR family                                |
|                                          | BRA0610 | 0.87  | response regulator/GGDEF domain protein                               |
|                                          | BR1187  | -0.86 | transcriptional regulator, Cro/CI family                              |
|                                          | BRA0354 | -0.98 | <i>oxyR</i> : transcriptional regulator OxyR                          |
|                                          | BR1115  | -1.02 | <i>ntrX</i> : nitrogen regulation protein NtrX                        |
|                                          | BR0872  | -1.08 | <i>exoR</i> : exopolysacchride production negative regulator          |
| <b>Stress &amp; adaptation</b>           |         |       |                                                                       |
|                                          | BR0171  | 2.08  | <i>grpE</i> : heat shock protein GrpE                                 |
|                                          | BR1047  | 1.40  | Universal stress protein UspA and related nucleotide-binding proteins |
|                                          | BR1514  | 1.19  | cold-shock family protein Csp                                         |
|                                          | BRA0341 | 1.02  | <i>hdeA</i> : hdeA protein                                            |
|                                          | BR0318  | 1.01  | <i>mscL</i> : large conductance mechanosensitive channel protein      |
|                                          | BR2126  | 0.99  | <i>dnaJ</i> : chaperone protein DnaJ                                  |
|                                          | BRA0295 | 0.95  | peptidyl-prolyl cis-trans isomerase, putative                         |
|                                          | BRA0184 | -0.84 | ATP phosphoribosyltransferase regulatory subunit                      |
|                                          | BRA0188 | -0.85 | <i>groEL</i> : chaperonin GroEL                                       |
|                                          | BR1943  | -0.94 | peptidyl-prolyl cis-trans isomerase                                   |
|                                          | BRA0195 | -1.07 | <i>groES</i> : co-chaperonin GroES                                    |
| <b>Sugar metabolism</b>                  |         |       |                                                                       |
|                                          | BR1729  | 1.48  | <i>pgk</i> : phosphoglycerate kinase                                  |
|                                          | BR2042  | -0.93 | L-sorbose dehydrogenase, FAD dependent, putative                      |

|                          |         |                                                                          |                                                                      |
|--------------------------|---------|--------------------------------------------------------------------------|----------------------------------------------------------------------|
|                          | BR0879  | -1.02                                                                    | glycosyl hydrolase, family 3                                         |
|                          | BRA0865 | -1.05                                                                    | <i>eryB</i> : erythritol phosphate dehydrogenase                     |
|                          | BRA0543 | -1.10                                                                    | <i>galE-2</i> : UDP-glucose 4-epimerase                              |
|                          | BR2042  | -1.31                                                                    | L-sorbose dehydrogenase, FAD dependent, putative                     |
|                          | BRA0871 | -1.86                                                                    | <i>fbaA</i> : fructose-bisphosphate aldolase                         |
| <b>Transport systems</b> |         |                                                                          |                                                                      |
|                          | BRA0408 | 1.98                                                                     | peptide ABC transporter, permease protein                            |
|                          | BR1349  | 1.86                                                                     | ABC transporter, permease protein, putative                          |
|                          | BRA0651 | 1.56                                                                     | branched-chain amino acid ABC transporter, ATP-binding protein       |
|                          | BR0639  | 1.47                                                                     | <i>omp2b</i> : porin Omp2a                                           |
|                          | BR1350  | 1.44                                                                     | ABC transporter, ATP binding/permease protein                        |
|                          | BRA0300 | 1.42                                                                     | <i>narK</i> : nitrite extrusion protein                              |
|                          | BR1959  | 1.23                                                                     | amino acid ABC transporter, ATP-binding protein                      |
|                          | BRA0534 | 1.18                                                                     | ABC transporter, ATP-binding protein                                 |
|                          | BRA0334 | 1.16                                                                     | hydrophobe/amphiphile efflux-1 family protein                        |
|                          | BRA0115 | 1.16                                                                     | ABC transporter, periplasmic substrate-binding protein               |
|                          | BR0225  | 1.07                                                                     | ABC transporter, periplasmic substrate-binding protein, putative     |
|                          | BRA1196 | 1.05                                                                     | branched-chain amino acid ABC transporter, ATP-binding protein       |
|                          | BRA0565 | 1.05                                                                     | <i>bfr</i> : bacterioferritin                                        |
|                          | BRA0334 | 1.04                                                                     | hydrophobe/amphiphile efflux-1 family protein                        |
|                          | BR1060  | 1.04                                                                     | HlyD family secretion protein                                        |
|                          | BR1325  | 1.03                                                                     | potassium efflux system family protein                               |
|                          | BRA1012 | 1.01                                                                     | <i>dppA</i> : ABC transporter, periplasmic substrate-binding protein |
|                          | BR0371  | 1.01                                                                     | membrane protein, putative, authentic point mutation                 |
|                          | BRA0503 | 0.98                                                                     | monovalent cation/proton antiporter, MnhE/PhaE subunit               |
|                          | BRA0749 | 0.97                                                                     | sugar ABC transporter, permease protein, putative                    |
|                          | BR0637  | 0.96                                                                     | <i>omp2a</i> : porin Omp2a                                           |
|                          | BRA0335 | 0.95                                                                     | HlyD family secretion protein                                        |
|                          | BRA0065 | 0.95                                                                     | <i>virB5</i> : type IV secretion system protein VirB5                |
|                          | BRA0657 | 0.94                                                                     | <i>ugpE</i> : glycerol-3-phosphate ABC transporter, permease protein |
|                          | BR1059  | 0.94                                                                     | drug resistance transporter, EmrB/QacA family                        |
|                          | BRA1081 | 0.90                                                                     | peptide ABC transporter, permease protein                            |
|                          | BR1568  | 0.87                                                                     | cation efflux family protein                                         |
|                          | BR1490  | 0.86                                                                     | transporter, putative                                                |
|                          | BR0222  | 0.86                                                                     | ABC transporter, permease protein                                    |
|                          | BR0291  | -0.82                                                                    | HlyD family secretion protein                                        |
|                          | BR0882  | -0.87                                                                    | <i>tatA</i> : twin arginine translocase protein A                    |
|                          | BR1699  | -0.90                                                                    | TonB system transport protein, ExbD/TolR family                      |
|                          | BRA0948 | -0.90                                                                    | amino acid ABC transporter, periplasmic amino acid-binding protein   |
|                          | BRA0115 | -0.90                                                                    | drug resistance transporter, Bcr/CflA family                         |
| BRA0993                  | -0.90   | <i>rbsC-4</i> : ribose ABC transporter, permease protein                 |                                                                      |
| BRA0675                  | -0.91   | iron compound ABC transporter, periplasmic iron compound-binding protein |                                                                      |

|                            |         |                               |                                                                                             |
|----------------------------|---------|-------------------------------|---------------------------------------------------------------------------------------------|
|                            | BRA0953 | -0.92                         | branched-chain amino acid ABC transporter, periplasmic amino acid-binding protein, putative |
|                            | BR2141  | -0.92                         | <i>pstB</i> : phosphate ABC transporter, ATP-binding protein                                |
|                            | BR1137  | -0.97                         | protein-export membrane protein                                                             |
|                            | BRA0518 | -0.99                         | sugar ABC transporter, permease protein                                                     |
|                            | BR0743  | -0.99                         | amino acid ABC transporter, permease protein                                                |
|                            | BR1269  | -0.99                         | hypothetical protein BR1269                                                                 |
|                            | BRA1183 | -1.07                         | sugar ABC transporter, ATP-binding protein, putative                                        |
|                            | BRA0090 | -1.09                         | <i>modC</i> : molybdenum ABC transporter, ATP-binding protein                               |
|                            | BRA0740 | -1.14                         | glycine betaine/L-proline ABC transporter, ATP-binding protein                              |
|                            | BR1490  | -1.16                         | transporter, putative                                                                       |
|                            | BR2055  | -1.20                         | branched-chain amino acid ABC transporter, permease protein                                 |
|                            | BR1700  | -1.26                         | <i>tolQ</i> : tolQ protein                                                                  |
|                            | BRA0519 | -2.16                         | sugar ABC transporter, permease protein                                                     |
| <b>Transposon function</b> |         |                               |                                                                                             |
|                            | BRA0557 | 1.87                          | IS66 family element, orf2, putative                                                         |
|                            | BR0523  | 1.75                          | ISBm1, transposase orfA                                                                     |
|                            | BRA0559 | 1.55                          | ISBm1, transposase orfA                                                                     |
|                            | BRA0556 | 1.32                          | IS66 family element, orf3, putative                                                         |
|                            | BR0533  | 1.12                          | ISBm1, transposase orfA                                                                     |
|                            | BR1673  | 1.03                          | IS711, transposase orfB                                                                     |
|                            | BRA0554 | 0.99                          | ISBm1, transposase orfB                                                                     |
|                            | BR0513  | 0.99                          | transposase, degenerate                                                                     |
| BRA0552                    | 0.93    | IS711, transposase orfA       |                                                                                             |
| <b>Unknown function</b>    |         |                               |                                                                                             |
|                            | BR0629  | 2.41                          | hypothetical protein                                                                        |
|                            | BRA0325 | 1.84                          | hypothetical protein                                                                        |
|                            | BRA0332 | 1.83                          | hypothetical protein                                                                        |
|                            | BRA0331 | 1.78                          | hypothetical protein                                                                        |
|                            | BR1355  | 1.62                          | hypothetical protein                                                                        |
|                            | BRA0564 | 1.61                          | hypothetical protein                                                                        |
|                            | BRA0665 | 1.59                          | hypothetical protein                                                                        |
|                            | BR0286  | 1.52                          | hypothetical protein                                                                        |
|                            | BR1593  | 1.51                          | hypothetical protein                                                                        |
|                            | BR1809  | 1.42                          | hypothetical protein                                                                        |
|                            | BRA0413 | 1.42                          | hypothetical protein                                                                        |
|                            | BR0727  | 1.37                          | hypothetical protein                                                                        |
|                            | BRA0716 | 1.32                          | <i>iolB</i> protein, authentic frameshift                                                   |
|                            | BR0962  | 1.32                          | hypothetical protein                                                                        |
|                            | BR1366  | 1.31                          | hypothetical protein                                                                        |
|                            | BRA0291 | 1.30                          | hypothetical protein                                                                        |
|                            | BR0983  | 1.27                          | hypothetical protein                                                                        |
| BRA1054                    | 1.26    | nitroreductase family protein |                                                                                             |

|         |      |                                                      |
|---------|------|------------------------------------------------------|
| BR2063  | 1.26 | hypothetical protein                                 |
| BRA0625 | 1.25 | hypothetical protein                                 |
| BR1353  | 1.23 | hypothetical protein                                 |
| BRA0818 | 1.20 | <i>crcB</i> family protein                           |
| BR1856  | 1.19 | hypothetical protein                                 |
| BR0207  | 1.19 | hypothetical protein                                 |
| BR1496  | 1.17 | hypothetical protein                                 |
| BRA0196 | 1.17 | hypothetical protein                                 |
| BR0730  | 1.16 | transposition protein, putative                      |
| BR0969  | 1.16 | hypothetical protein                                 |
| BRA0141 | 1.14 | SyrB family protein, putative                        |
| BR1046  | 1.13 | phosphoribosyltransferase family protein             |
| BR0892  | 1.12 | hypothetical protein                                 |
| BRA0575 | 1.12 | hypothetical protein                                 |
| BRA0635 | 1.11 | twin-arginine translocation signal domain protein    |
| BR0734  | 1.10 | hypothetical protein                                 |
| BR1206  | 1.10 | ATPase, AAA family                                   |
| BR1841  | 1.10 | iojap-related protein                                |
| BR2136  | 1.08 | hypothetical protein                                 |
| BRA0264 | 1.08 | hypothetical protein                                 |
| BRA0168 | 1.07 | hypothetical protein                                 |
| BR0084  | 1.06 | hypothetical protein                                 |
| BR0049  | 1.04 | hypothetical protein                                 |
| BRA0613 | 1.04 | hypothetical protein                                 |
| BR0165  | 1.04 | hypothetical protein                                 |
| BR2133  | 1.03 | hypothetical protein                                 |
| BRA0978 | 1.03 | conserved hypothetical protein, authentic frameshift |
| BRA1062 | 1.01 | hypothetical protein                                 |
| BRA1026 | 1.00 | hydrolase, haloacid dehalogenase-like family         |
| BRA0717 | 0.99 | inositol monophosphatase family protein              |
| BR1626  | 0.99 | hypothetical protein                                 |
| BR0226  | 0.99 | hypothetical protein                                 |
| BRA0343 | 0.99 | hypothetical protein                                 |
| BR0785  | 0.99 | hypothetical protein                                 |
| BR0369  | 0.99 | hypothetical protein                                 |
| BR1411  | 0.98 | hypothetical protein                                 |
| BR1518  | 0.97 | hypothetical protein                                 |
| BR1024  | 0.96 | hypothetical protein                                 |
| BR1419  | 0.95 | hypothetical protein                                 |
| BR0951  | 0.95 | glutathione S-transferase domain protein             |
| BRA1037 | 0.94 | hypothetical protein                                 |
| BRA0255 | 0.94 | hypothetical protein                                 |
| BR1822  | 0.94 | LemA protein, putative                               |



|         |       |                                                              |
|---------|-------|--------------------------------------------------------------|
| BRA0596 | 0.94  | metal-dependent hydrolase                                    |
| BRA0824 | 0.93  | hypothetical protein                                         |
| BR0517  | 0.91  | formyltransferase, putative                                  |
| BRA0478 | 0.90  | hypothetical protein                                         |
| BR0571  | 0.90  | hypothetical protein                                         |
| BRA1061 | 0.90  | hypothetical protein                                         |
| BRA0787 | 0.90  | hypothetical protein                                         |
| BRA0606 | 0.90  | hypothetical protein                                         |
| BRA0397 | 0.89  | shikimate dehydrogenase family protein                       |
| BR1054  | 0.89  | hypothetical protein                                         |
| BRA0141 | 0.89  | hypothetical protein                                         |
| BR2012  | 0.88  | hypothetical protein                                         |
| BR1968  | 0.88  | hypothetical protein                                         |
| BR1750  | 0.88  | hypothetical protein                                         |
| BR0687  | 0.88  | hypothetical protein                                         |
| BR0740  | 0.88  | PAP2 family protein                                          |
| BR0180  | 0.88  | hypothetical protein                                         |
| BR2007  | -0.82 | hypothetical protein                                         |
| BR1273  | -0.83 | <i>glpX</i> : glpX protein                                   |
| BR1291  | -0.85 | phospholipase/carboxylesterase family protein                |
| BRA0318 | -0.86 | hypothetical protein                                         |
| BRA1032 | -0.86 | hypothetical protein                                         |
| BRA0839 | -0.87 | hypothetical protein                                         |
| BR0140  | -0.87 | NifU-related protein                                         |
| BR1847  | -0.87 | acetyltransferase, GNAT family                               |
| BR1921  | -0.88 | hypothetical protein                                         |
| BR0818  | -0.89 | glyoxalase family protein                                    |
| BR0746  | -0.89 | monooxygenase                                                |
| BR1164  | -0.90 | hypothetical protein                                         |
| BR1150  | -0.90 | conserved hypothetical protein                               |
| BR0799  | -0.90 | hypothetical protein                                         |
| BR1378  | -0.91 | aminotransferase, class I                                    |
| BRA0879 | -0.91 | glyoxalase family protein                                    |
| BR1025  | -0.92 | hypothetical protein                                         |
| BR1641  | -0.93 | hypothetical protein                                         |
| BR0327  | -0.96 | hypothetical protein                                         |
| BRA0836 | -0.96 | hypothetical protein                                         |
| BRA0729 | -0.98 | pyridine nucleotide-disulphide oxidoreductase family protein |
| BR1290  | -0.99 | hypothetical protein                                         |
| BR1113  | -0.99 | hypothetical protein                                         |
| BR0335  | -1.00 | hypothetical protein                                         |
| BR2008  | -1.01 | hypothetical protein                                         |
| BRA1201 | -1.01 | hypothetical protein                                         |

|         |       |                                     |
|---------|-------|-------------------------------------|
| BR0506  | -1.01 | BioY family protein                 |
| BR1443  | -1.04 | transglycosylase SLT domain protein |
| BR1752  | -1.04 | hypothetical protein                |
| BR0964  | -1.05 | hypothetical protein                |
| BR1327  | -1.06 | hypothetical protein                |
| BR1275  | -1.06 | hypothetical protein                |
| BRA0861 | -1.06 | hypothetical protein                |
| BR2098  | -1.06 | hypothetical protein                |
| BR0391  | -1.08 | hypothetical protein                |
| BR0838  | -1.09 | lipoprotein, putative               |
| BR1011  | -1.11 | hypothetical protein                |
| BR1136  | -1.18 | hypothetical protein                |
| BR1574  | -1.22 | hypothetical protein                |
| BR1516  | -1.24 | hypothetical protein                |
| BRA0873 | -1.25 | hypothetical protein                |
| BRA0382 | -1.28 | hypothetical protein                |
| BRA0759 | -1.36 | hypothetical protein                |
| BRA0476 | -1.42 | hypothetical protein                |
| BRA0875 | -1.52 | GTP-binding protein TypA            |
| BRA0438 | -1.58 | methyltransferase, putative         |
| BR0389  | -1.71 | hypothetical protein                |
| BR0391  | -1.71 | hypothetical protein                |
| BR2041  | -1.82 | hypothetical protein                |

<sup>a</sup>Annotations according to the "JCVI Comprehensive Microbial Resource" (J. Craig Venter Institute; <http://cmr.jvci.org/cgi-bin/CMR/CmrHomePage.cgi>).
