# Supplementary material for: Global Rsh-dependent transcription profile of Brucella suis during stringent response unravels adaptation to nutrient starvation and cross-talk with other stress responses
Source: PubMed Central journal article supplement (PMC3710219; doi:10.1186/1471-2164-14-459), 2013-07-08
Supplement: 1471-2164-14-459-S2.pdf [file 1471-2164-14-459-S2.pdf]

A

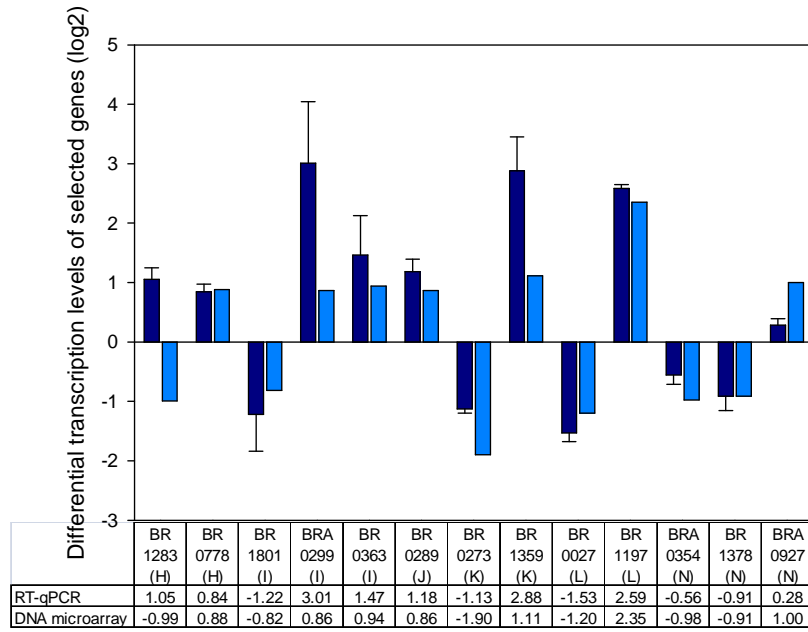

B

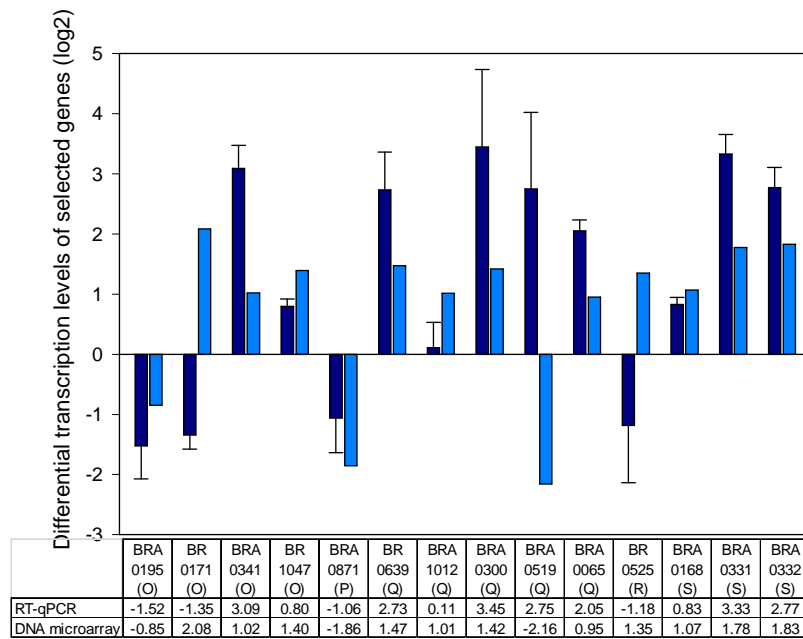

Figure S1
