# Supplementary material for: Global Rsh-dependent transcription profile of Brucella suis during stringent response unravels adaptation to nutrient starvation and cross-talk with other stress responses
Source: PubMed Central journal article supplement (PMC3710219; doi:10.1186/1471-2164-14-459), 2013-07-08
Supplement: 1471-2164-14-459-S3.pdf [file 1471-2164-14-459-S3.pdf]

**Table S2. Oligonucleotides used in this study.**

| <b>Designation</b> | <b>Sequence (5'- 3')</b> | <b>Designation</b>   | <b>Sequence (5'- 3')</b> |
|--------------------|--------------------------|----------------------|--------------------------|
| BR0118-F           | TTACCAGCACCAGCGCATATG    | BR2042-F             | AGCACATGAAGAACCGTGTGC    |
| BR0118-R           | TGGTGC GGTTTTCAAGCTTGG   | BR2042-R             | GTCGTTGAAACGCTGATTGTC    |
| BR0525-F           | ACTACGAGATCGGCTACTTCC    | BRA0299-F            | GTCTGCATGTCCTTCTACGAC    |
| BR0525-R           | TTGTGGCCTTGCGATAGATAC    | BRA0299-R            | AGCATGAGGAAACCGGCATTG    |
| BR0614-F           | TTGTGGCTGGATCGTTCTTGG    | BRA0300-F            | GTTGCATTTGGCTGGCATAACG   |
| BR0614-R           | GACACGGAAGACGTAACCATC    | BRA0300-R            | GACCTGAATGTTCTTGAGTGG    |
| BR0982-F           | AAGTTCGTAAGAGACGGACG     | BRA0331-F            | GTGCGTTATCGAATCTTGAGG    |
| BR0982-R           | AGTACTACAGCAATTGCAGC     | BRA0331-R            | ACACGGGCAATCTCATTACAG    |
| BR0363-F           | CTCAACCTCCAGCCCTACTTC    | BRA0332-F            | TGCAGATGGTTCTCTTGCTGG    |
| BR0363-R           | CCCAGAATACGAACCAGGCGAGA  | BRA0332-R            | CGTGGTTTCTCTGGGAATTCC    |
| BR1197-F           | CAACCGCCATTCACGACTTTG    | BRA0338-F            | TCAGAATCTGGCGACCTTCTG    |
| BR1197-R           | TCATCGAGGCGCAGATATTCG    | BRA0338-R            | TGACACAGCGCAGATCAATGG    |
| BR1359-F           | CCAAGATCGATTGGCTTGTGC    | BRA0341-F            | AAGGTGAGTGAACCTCACCTGC   |
| BR1359-R           | CACCTCCTTGAGATGGACGTG    | BRA0341-R            | TACCATCAACGTCGATGACGG    |
| BR1930-F           | GCACGGTGCAGAAAGGCAATC    | BRA0519-F            | GCTTTAGCCTCATCGGTTATG    |
| BR1930-R           | TAGCCCTGGCCATATTTGGTC    | BRA0519-R            | ATGCCGATTGCCAGATAGAGC    |
| BR1993-F           | TCGACCGTTTCCTTTACACAC    | BRA0530-F            | CCTTGCAGATGATATCGCTCG    |
| BR1993-R           | CGAATTGTCTTCCATGACCAG    | BRA0530-R            | AGGCGATAATTGGACGACTCG    |
| BR0778-F           | CTGTGACGCTATCGTCAATGG    | BRA0703-F            | AGTTGGCACCGTGGTCATTTT    |
| BR0778-R           | TGACGCTTCTGATGTTCTCTGC   | BRA0703-R            | GTGATGGGTATTACCCGGATC    |
| BR0289-F           | ACATCGTCAATCTGGTCGTGC    | BRA0927-F            | TGCATCAGCGTATTCTGGACG    |
| BR0289-R           | ATCCACAGGTTTCATCTGCTCG   | BRA0927-R            | TTCACGGTCATGCGTGAACAG    |
| BR1047-F           | ACGGCTGAAGCATGTCTTCG     | BR1801-F             | ATGCTCTCGGCAATCCGATTG    |
| BR1047-R           | GCGGTTTCGTCATTGGTTGC     | BR1801-R             | GCTTCTGGTTGAGGAAGGTG     |
| BR0615-F           | CTGATTTCCGACGTCGTGAAGC   | BR1378-F             | GATATCATTTCCTTCGCAGGC    |
| BR0615-R           | CAGTTCATGGTCGATAGTGC     | BR1378-R             | ATCTTGGCGAGTTCCGCAAC     |
| BR0273-F           | AGACCACACTGACCGAAAAGC    | BRA1012-F            | TACAGGTTCAAGCTGCGTCAG    |
| BR0273-R           | ACGGTCTTCCGACAAGGCTTG    | BRA1012-R            | TGAACAGGAAATTCGAGGTCG    |
| BR0171-F           | ACGAAACCGCAAACCGTATCG    | BR1983-F             | GCAAGTCGGAGAACAAGTTCC    |
| BR0171-R           | AACCGAAAGCATGTCACGAGC    | BR1983-R             | GCAATTCCTTCACCAGTTCC     |
| BRA0168-F          | ATCCTTGATCTTGAGGATGCC    | BR0027-F             | GCGACGAAGTGAAGTTTACG     |
| BRA0168-R          | AGAGCAATCAGCGGCAAGTCG    | BR0027-R             | CCACCCTTGACCTGATTGAAG    |
| BRA0354-F          | TGTTTACAACCAGCACTCTCC    | BR0305-F             | TGACGCAAGGCTTCCTTTACC    |
| BRA0354-R          | TTGTGCGGCTATTTCTCCAG     | BR0305-R             | CCGACCACCGACATGTTTGAA    |
| BRA0557-F          | TTCAGGAAGGGCATCAATGGG    | BRA0486-F            | GCCTTCTCAATCTGATGCCCA    |
| BRA0557-R          | CCAAACGACCATCTTCAGACG    | BRA0486-R            | CGACCACATGCTCTCCTTCTA    |
| BRA0871-F          | ACAACATGGAACAGGCACTGG    | BR1450-F             | GAATTCTTCCCTCCAAGACG     |
| BRA0871-R          | TTGCCATGGTCGAGATGCACG    | BR1450-R             | GCACATCTGACCTGCGTGGAT    |
| BR0119-F           | GTTGTTGTTGCTCCGACCTTC    | <i>met-H</i> For     | CGGTGACTGTCCAAAACACG     |
| BR0119-R           | GAAACGTCGTTATAGGTCACG    | <i>met-H</i> Rev     | TCCACC GCAAAGCTTGAAGC    |
| BRA0195-F          | CTCGCTGACGCTGTTAAGGTC    | Kan <sup>R</sup> For | GGATTCACTGCTCACTCATGG    |
| BRA0195-R          | AGTATCGTTGGTCTTGGAAGC    | Kan <sup>R</sup> Rev | CCATGAGTGACGACTGAATCC    |
| BR0639-F           | CGCTGGCTACTTCTACATTCC    | BR1035-F             | TCTTCTACGACATGCCAAAGC    |
| BR0639-R           | TGCCGAGTTCGGTTCCGAAC     | BR1035-R             | AAAGCCCGGTTTCTTTTCATCG   |
| BR0793-F           | TTGCGATTCTGCATGTGACG     | BR1871-F             | TCAGGTTGCCGTGGTCTGTTT    |
| BR0793-R           | CAATGACGAGACATGCTGCGA    | BR1871-R             | TGAAGCGCAATTGCCAGAAGG    |
| metA-F             | TGCCAGAACACTATTGCCAGC    | BR1274-F             | CGTATTCTGCGTGACAAGTCC    |
| metA-R             | CGTCTTCCGATCCATGGAAGA    | BR1274-R             | CAGATTTGGCAAGTTCCACCG    |
| metZ-F             | ACCTGTTCCGTGGTGATTTGG    |                      |                          |
| metZ-R             | CGTTGACGTCACCGCAACTTT    |                      |                          |
